# Supplementary material
Source: publisher site journal article supplement (http://www.kjim.org/upload/media/kjim-2020-132-suppl2.pdf)
Supplement: Supplementary file 1 [file kjim-2020-132-suppl2.pdf]

**Supplementary methods.** TaqMan RT-qPCR analysis  
Levels of miR-21 and IL-12p35 expression were measured quantitatively by using TaqMan microRNA assay and TaqMan gene expression assay (Applied Biosystems, Foster City, CA, USA), as described following manufacturer's protocol, and assayed on the CFX96 Real-Time PCR Detection System (Bio-Rad Laboratories, Hercules, CA, USA).
